# Inhibition of Cyclooxygenase-2 Reduces Hypothalamic Excitation in Rats with Adriamycin-Induced Heart Failure

Min Zheng<sup>1,2</sup><sup>\*</sup>, Yu-Ming Kang<sup>3\*</sup><sup>✉</sup>, Wei Liu<sup>1</sup>, Wei-Jin Zang<sup>4</sup>, Cui-Yu Bao<sup>2</sup>, Da-Nian Qin<sup>1\*</sup>

**1** Department of Physiology, Shantou University Medical College, Shantou, P. R. China, **2** Department of Biomedical Engineering, Hubei University of Science and Technology, Xianning, P. R. China, **3** Department of Physiology and Pathophysiology, Xi'an Jiaotong University School of Medicine, Xi'an Jiaotong University Cardiovascular Research Center, Xi'an, P. R. China, **4** Department of Pharmacology, Xi'an Jiaotong University School of Medicine, Xi'an, P. R. China

## Abstract

**Background:** The paraventricular nucleus (PVN) of the hypothalamus plays an important role in the progression of heart failure (HF). We investigated whether cyclooxygenase-2 (COX-2) inhibition in the PVN attenuates the activities of sympathetic nervous system (SNS) and renin-angiotensin system (RAS) in rats with adriamycin-induced heart failure.

**Methodology/Principal Finding:** Heart failure was induced by intraperitoneal injection of adriamycin over a period of 2 weeks (cumulative dose of 15 mg/kg). On day 19, rats received intragastric administration daily with either COX-2 inhibitor celecoxib (CLB) or normal saline. Treatment with CLB reduced mortality and attenuated both myocardial atrophy and pulmonary congestion in HF rats. Compared with the HF rats, ventricle to body weight (VW/BW) and lung to body weight (LW/BW) ratios, heart rate (HR), left ventricular end-diastolic pressure (LVEDP), left ventricular peak systolic pressure (LVPS) and maximum rate of change in left ventricular pressure ( $LV \pm dp/dt_{max}$ ) were improved in HF+CLB rats. Angiotensin II (ANG II), norepinephrine (NE), COX-2 and glutamate (Glu) in the PVN were increased in HF rats. HF rats had higher levels of ANG II and NE in plasma, higher level of ANG II in myocardium, and lower levels of ANP in plasma and myocardium. Treatment with CLB attenuated these HF-induced changes. HF rats had more COX-2-positive neurons and more corticotropin releasing hormone (CRH) positive neurons in the PVN than did control rats. Treatment with CLB decreased COX-2-positive neurons and CRH positive neurons in the PVN of HF rats.

**Conclusions:** These results suggest that PVN COX-2 may be an intermediary step for PVN neuronal activation and excitatory neurotransmitter release, which further contributes to sympathoexcitation and RAS activation in adriamycin-induced heart failure. Treatment with COX-2 inhibitor attenuates sympathoexcitation and RAS activation in adriamycin-induced heart failure.

**Citation:** Zheng M, Kang Y-M, Liu W, Zang W-J, Bao C-Y, et al. (2012) Inhibition of Cyclooxygenase-2 Reduces Hypothalamic Excitation in Rats with Adriamycin-Induced Heart Failure. PLoS ONE 7(11): e48771. doi:10.1371/journal.pone.0048771

**Editor:** Wolfgang Rudolf Bauer, University Hospital of Würzburg, Germany

**Received:** June 19, 2012; **Accepted:** October 4, 2012; **Published:** November 13, 2012

**Copyright:** © 2012 Zheng et al. This is an open-access article distributed under the terms of the Creative Commons Attribution License, which permits unrestricted use, distribution, and reproduction in any medium, provided the original author and source are credited.

**Funding:** This work was supported by National Basic Research Program of China (No. 2012CB517805), National Natural Science Foundation of China (Nos. 81170248, 81070199), foundation of Hubei Provincial Department of Education (No. Z20092801) and Shantou University Medical College Grant. The funders had no role in study design, data collection and analysis, decision to publish, or preparation of the manuscript.

**Competing Interests:** The authors have declared that no competing interests exist.

\* E-mail: dnqin@stu.edu.cn (DNQ); ykang@mail.xjtu.edu.cn (YMK)

✉ These authors contributed equally to this work.

## Introduction

Congestive heart failure (HF) is a serious cardiovascular disease that increases morbidity and mortality and causes an economic burden on families and societies. Unfortunately, the mechanism of HF is not clear. Increased sympathetic drive is one of the pathophysiological characteristics of HF, and it is a major contributor to the morbidity and mortality of HF patients. Recently, researchers demonstrated that a central nervous system mechanism contributes to the sympathetic nervous system (SNS) abnormality in HF [1–3]. The paraventricular nucleus (PVN) of hypothalamus is an important center for the integration of sympathetic nerve activity [4] and the regulation of cardiovascular function and fluid homeostasis [5].

Large amounts of excitatory and inhibitory neurotransmitters, such as glutamate (Glu), norepinephrine (NE) and gamma-aminobutyric acid (GABA) converge in the PVN to influence its

neuronal activity [4]. The increases of Glu and NE or decrease of GABA have been demonstrated to be involved in the control of cardiovascular reflexes [6,7] and sympathoexcitation in HF rats [8,9]. Recent findings showed that excess amounts of inflammatory mediators and renin-angiotensin system (RAS) components are present in the PVN and contribute to neurohumoral excitation in HF [3,10–14]. As to how the inflammation factors interact with neurotransmitters, SNS and RAS in HF, our previous works in the ischemia-induced HF demonstrated the following relevant findings: (i) increased hypothalamic proinflammatory cytokines (PIC) contribute to the upregulation of central neural systems activity, including the increased SNS, central RAS and the hypothalamic-pituitary adrenal (HPA) axis activity in HF [13]; (ii) NF- $\kappa$ B mediates the cross-talk between RAS and PIC in the PVN in HF, and that superoxide stimulates more NF- $\kappa$ B in the PVN and contributes to neurohumoral excitation [12]; and (iii) increased PIC, such as brain tumor necrosis factor- $\alpha$  (TNF- $\alpha$ ), modulate

PVN neurotransmitters and contributes to sympathoexcitation in HF [3].

Cyclooxygenase-2 (COX-2) is the key synthetase of prostaglandin  $E_2$  (PGE<sub>2</sub>) [11,15], a kind of ubiquitous central proinflammatory mediator, which acts in the brain and activates the hypothalamic-pituitary-adrenal (HPA) axis [16] to facilitate sympathetic drive [17] and may contribute to the pathogenesis of HF. Our recent studies suggested that activation of NF- $\kappa$ B in PVN is an intermediary step in the induction of COX-2 in the PVN of ischemia-induced HF rats [14,18]. However, it is not known whether COX-2 induction results in PVN neurotransmitters and RAS diversity and further influence neuronal activity. Delgado and colleagues [19] found that COX-2 inhibitor treatment can improve left ventricular function and mortality in a murine model of doxorubicin-induced HF, but they did not investigate the potential central and neuroendocrine mechanisms for this improvement in detail. In this study, we selected the adriamycin-induced rat HF model, another widely used HF experimental model exhibiting neuroendocrine activation, for our experiments. We hypothesized that an increase in PVN COX-2 would upregulate the activities of central neural systems that contribute to increased activation of the SNS, RAS and the HPA axis in adriamycin-induced HF rats, and the protective effects of the COX-2 inhibitor, celecoxib (CLB), against adriamycin-induced HF may be involved in this mechanism.

## Results

### Mortality and Survival

During the COX-2 inhibitor treatment period (days 19 to 44), mortality was 20% (10/50) for HF+CLB treated rats versus 40% (20/50) for the HF rats. The death rate, as evaluated by chi-square criterion, was significantly higher in HF group than in the control group ( $P<0.05$ ). CLB treatment appeared to improve survival (HF+CLB: 80%; HF: 60%) during CLB treatment period (days 19 to 44).

### Anatomical Indicators of Heart Failure

In HF rats, there were myocardial injury and pulmonic congestive changes, such as myocardial cells atrophy, degeneration and arranging disorder, alveolar capillary and venules proliferation and congestion. Treatment with CLB attenuated these HF-induced pathological changes (Figure 1A and 1B).

The VW/BW ratio and wet LW/BW ratio were lower in HF+CLB than HF rats ( $P<0.01$ , Figure 1C).

### Functional Indicators of HF

Compared with control rats, HF rats had significantly higher heart rates (HR) and left ventricular end-diastolic pressures (LVEDP), lower left ventricular peak systolic pressures (LVPS) and maximum rate of change in left ventricular pressure ( $LV\pm dp/dt_{max}$ ) (Table 1). The HF+CLB rats had significantly higher LVPS and  $LV\pm dp/dt_{max}$ , lower HR and LVEDP than the HF rats.

### Plasma Levels of ANG II, NE and Atrial Natriuretic Peptide (ANP)

Plasma ANG II and NE levels in HF rats were significantly higher than those in normal control rats ( $1248\pm 94$  versus  $423\pm 77$  pg/ml for ANG II,  $P<0.01$ , Figure 2A;  $72.11\pm 5.26$  versus  $50.95\pm 2.78$  ng/ml for NE,  $P<0.01$ , Figure 2B). The plasma ANG II and NE levels were lower in HF+CLB rats than in HF rats ( $446\pm 79$  versus  $1248\pm 94$  pg/ml for ANG II,  $P<0.01$ , Figure 2A;  $48.92\pm 3.74$  versus  $72.11\pm 5.26$  ng/ml for NE,

$P<0.01$ , Figure 2B). Plasma ANP levels were significantly lower in HF rats than in control rats ( $75.62\pm 10.88$  versus  $303.74\pm 46.37$  pg/ml,  $P<0.01$ , Figure 2C). The plasma ANP level was higher in HF+CLB rats than in HF rats ( $159.53\pm 33.38$  versus  $75.62\pm 10.88$  pg/ml,  $P<0.01$ , Figure 2C), but still significantly lower than in control rats ( $P<0.01$ ).

### Myocardial Levels of ANG II and ANP

Changes of myocardial ANG II and ANP in HF rats were consistent with the plasma levels. Myocardial ANG II level was higher in HF rats than in control rats ( $12.11\pm 2.07$  versus  $3.07\pm 0.78$  ng/g protein,  $P<0.01$ , Figure 3A). Myocardial ANG II levels were significantly lower in HF+CLB rats than in HF rats ( $4.87\pm 1.22$  versus  $12.11\pm 2.07$  ng/g protein,  $P<0.01$ , Figure 3A). Myocardial ANP level was lower in HF rats than in control rats ( $25.69\pm 5.43$  versus  $52.32\pm 7.90$  ng/g protein,  $P<0.01$ , Figure 3B). The HF+CLB rats had significantly higher ANP levels than the HF rats ( $43.84\pm 8.72$  versus  $25.69\pm 5.43$  ng/g protein,  $P<0.05$ , Figure 3B).

### PVN Levels of ANG II and NE

PVN ANG II and NE levels in HF rats were significantly higher than in control rats ( $5.33\pm 0.97$  versus  $2.91\pm 0.37$  ng/g protein for ANG II,  $P<0.01$ , Figure 4A;  $159.52\pm 28.46$  versus  $101.06\pm 8.01$  ng/g protein for NE,  $P<0.01$ , Figure 4B). The PVN ANG II and NE levels were lower in HF+CLB rats than in HF rats ( $3.12\pm 0.36$  versus  $5.33\pm 0.97$  ng/g protein for ANG II,  $P<0.01$ , Figure 4A;  $107.54\pm 15.82$  versus  $159.52\pm 28.46$  ng/g protein for NE,  $P<0.01$ , Figure 4B), and did not significantly differ from levels seen in control rats.

### Western Blot Detection of COX-2 Protein in the PVN

As shown in Figure 5, HF rats had a substantial increase in COX-2 protein expression in the PVN when compared with control rats ( $P<0.01$ ). This increase was suppressed by treatment with COX-2 inhibitor CLB ( $P<0.05$ ).

### Immunohistochemistry for COX-2 and CRH in the PVN

Immunohistochemistry studies revealed that HF rats had more COX-2 and CRH-positive neurons in the PVN than control rats (Figure 6). There were fewer positive COX-2 and CRH neurons in the PVN of HF+CLB rats than in HF rats (Figure 6).

### Neurotransmitters in the PVN

Compared with control rats, HF rats had higher levels of glutamate in the PVN ( $179\pm 18$  versus  $79\pm 11$   $\mu$ mol/g protein,  $P<0.01$ , Figure 7). Glutamate in the PVN in HF+CLB rats was decreased after 4 weeks' treatment ( $83\pm 12$  versus  $179\pm 18$   $\mu$ mol/g protein,  $P<0.01$ , Figure 7), and levels did not differ significantly from those seen in control rats. There were no significant differences detected in GABA levels among any of the rat groups.

## Discussion

The novel findings of the present study are: (i) adriamycin-induced HF rats had higher PVN levels of glutamate, NE, ANG II, CRH and COX-2, higher plasma levels of ANG II and NE, and lower levels of ANP in plasma and myocardium; and (ii) treatment with CLB attenuated these HF-induced changes, reduced mortality and improved myocardial atrophy, pulmonary congestion and hemodynamic parameters of HF rats. Our findings suggest that COX-2 might be an important factor responsible for the PVN activation and contributes to sympathoexcitation and RAS activation in adriamycin-induced heart failure.

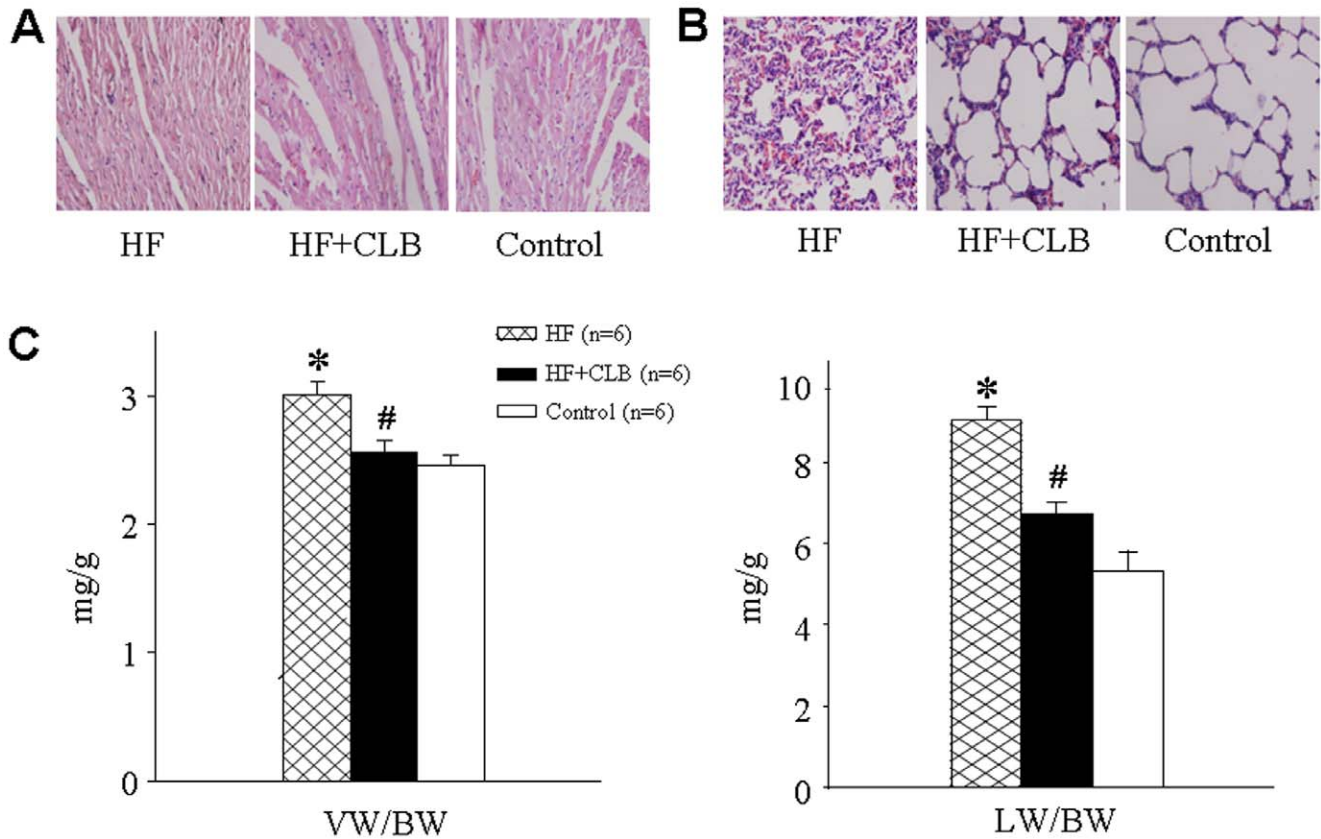

**Figure 1. Effect of CLB on anatomical indicators of heart failure.** A. Representative microphotograph of myocardium in different groups. B. Representative microphotograph of Lung in different groups. C. Group data showing the effect of treatment with celecoxib (CLB) *via* intragastric administration on VW/BW (ratio of ventricle to body weight) and LW/BW (ratio of lung to body weight) in ADM-induced heart failure (HF) rats. \* $P < 0.01$  vs. control group; # $P < 0.01$  vs. HF group. doi:10.1371/journal.pone.0048771.g001

Neuroendocrine activation is believed to play an important role in the pathogenesis of chronic congestive heart failure. Specifically, excess activation of SNS, RAS and the HPA axis have been implicated [13,20–24]. Intraperitoneal injection of a cumulative dose of adriamycin over a period of 2 to 6 weeks has been shown to induce congestive heart failure and neuroendocrine activation [19,25–29]. The present study found that PVN COX-2 is implicated in the regulation of neurohormones in adriamycin-induced HF rats *via* its influence on sympathetic drive, and *via* activation of RAS and HPA axis. It is demonstrated that PGE<sub>2</sub>, as

the principal product of COX-2 in the hypothalamus, plays a major role in activating the HPA axis [16]. Further, upregulation of the brain RAS results in sympathoexcitation in HF [10,30–32], and ANG II in hypothalamus may modulate thirst and salt appetite [33,34] and activate neurons containing CRH [35–37] and arginine vasopressin [38,39]. Our previous studies have also demonstrated that increased hypothalamic proinflammatory cytokines activate RAS and the HPA axis [13], modulate PVN neurotransmitters, and contribute to sympathoexcitation in ischemia-induced HF [3].

In summary, the findings from the present study suggest that COX-2 in the PVN may be an intermediary step for PVN neuronal activation and excitatory neurotransmitter release, which further contributes to sympathoexcitation and RAS activation in adriamycin-induced heart failure. Treatment with a COX-2 inhibitor attenuates sympathoexcitation and RAS activation in adriamycin-induced heart failure.

**Table 1. Effect of CLB on HR and hemodynamics in adriamycin-induced heart failure rats.**

| Group   | HR (beats/min) | LVPSP (mmHg) | LVEDP (mmHg)       | LV+dp/dtmax (mmHg/s) | LV-dp/dtmax (mmHg/s) |
|---------|----------------|--------------|--------------------|----------------------|----------------------|
| Control | 362±23         | 123±7        | 3±2                | 7199±896             | 5608±976             |
| HF      | 450±25*        | 84±11*       | 24±5*              | 3541±372*            | 3126±560*            |
| HF+CLB  | 393±37#        | 112±9#       | 8±4 <sup>△</sup> # | 5598±719*#           | 4807±627#            |

(n = 10). Values are mean±SEM; HR, heart rate; LVPSP, left ventricular peak systolic pressure; LVEDP, left ventricular end-diastolic pressure; LV±dp/dtmax, maximum rate of change in left ventricular pressure. \* $P < 0.01$ , <sup>△</sup> $P < 0.05$  vs. control group; # $P < 0.01$  vs. HF group. doi:10.1371/journal.pone.0048771.t001

## Materials and Methods

### Drugs and Reagents

The COX-2 inhibitor celecoxib (CLB) used in this study was obtained from Pfizer Pharmaceuticals Ltd (Newyork, USA). Adriamycin (ADM, Doxorubicin) was purchased from a local pharmacy. O-phthaldialdehyde (OPA) and standard preparation of L-glutamate and GABA were purchased from Sigma-Aldrich (St. Louis, MO, USA). Rat ANG II, NE and ANP ELISA Kits

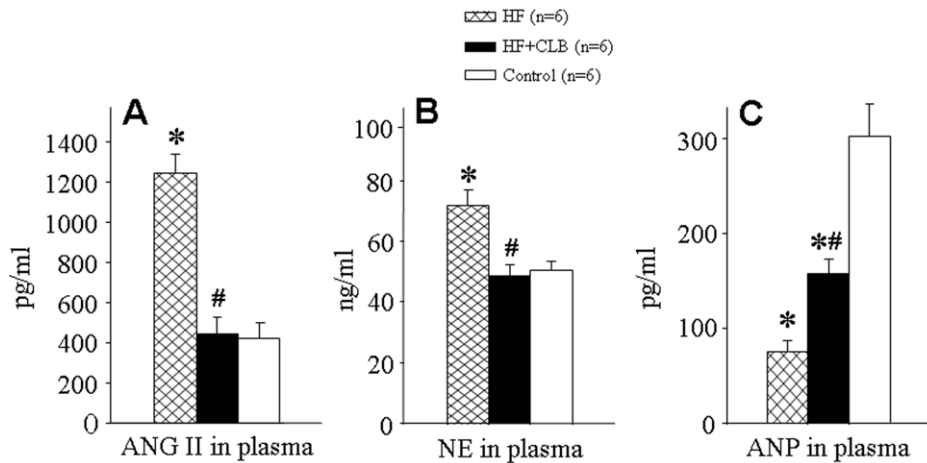

**Figure 2. Effect of CLB on plasma levels of ANG II, NE and ANP in ADM-induced HF rats.** A. Plasma ANG II. B. Plasma NE. C. Plasma ANP. HF rats had the higher plasma levels of ANG II and NE when compared with control rats, which were obviously lower in HF+CLB rats. Plasma ANP was lower in HF rats than in control rats. Plasma ANP in HF+CLB rats was significantly higher than in HF rats. \* $P < 0.01$  vs. control group; # $P < 0.01$  vs. HF group.

doi:10.1371/journal.pone.0048771.g002

were offered by Cusabio Biotech. The goat anti-COX-2 monoclonal antibody, rabbit anti-CRH polyclonal antibody, anti-GAPDH antibodies were purchased from Santa Cruz Biotechnology. Streptavidin/Peroxidase Histostain-Plus Kit was obtained from ZYMED (USA). BCA Total Protein Quantification Kit, SDS-PAGE gel Kit and other Western-blotting reagents were purchased from Beyotime Institute of Biotechnology (Shanghai, China).

### Animal Preparation

Adult male Sprague-Dawley rats weighing 220 to 250 g were provided by Experimental Animal Center of Shantou University Medical College. These studies were performed in accordance with the "Guiding principles for research involving animals and human beings" [40]. All experimental protocols were approved by the Review Committee for the Use of Human or Animal Subjects of Shantou University Medical College.

### Heart Failure Induction Protocol

Heart failure was induced experimentally by intraperitoneal injections of the cardiotoxic agent adriamycin (ADM) for a cumulative dose of 15 mg/kg in 6 injections (ADM, 2.5 mg/kg $\times$ 6) over a 2 week period. This reproducible model described as previously could induce progression to end-stage heart failure at most states [25–27]. Animals in the control group were treated with saline. The weight of rat was measured to recalculate dose prior to every administration, and was kept on monitoring once a week subsequently until the termination of test.

### COX-2 Inhibitor Management Protocol

On the day 19 of the HF induction protocol, 100 HF-induced rats were randomly divided into 2 groups, one to receive the COX-2 inhibitor CLB (i.e. HF+CLB,  $n = 50$ ) and the other to serve as HF group ( $n = 50$ ). The COX-2 inhibitor celecoxib (CLB) we used is a selective inhibitor of COX-2 that has no significant activity against COX-1 when administered in clinical effective

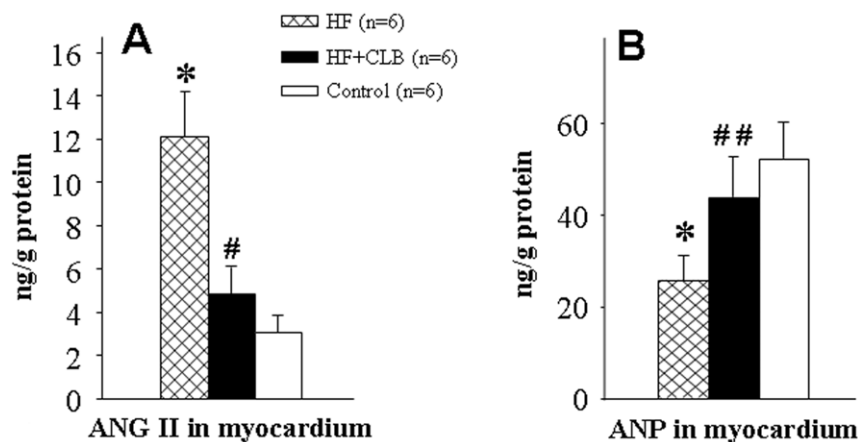

**Figure 3. Effect of CLB on myocardial levels of ANG II and ANP in ADM-induced HF rats.** A. Comparison of myocardial AngII. Myocardial ANG II level was higher in HF rats than in control rats. The myocardial ANG II level was significantly lower in HF+CLB rats than in HF rats. B. Comparison of myocardial ANP. The myocardial ANP level was lower in HF rats than in control rats. The HF+CLB rats had significantly higher ANP level than the HF model rats.\* $P < 0.01$  vs. control group; # $P < 0.01$ , ## $P < 0.05$  vs. HF group.

doi:10.1371/journal.pone.0048771.g003

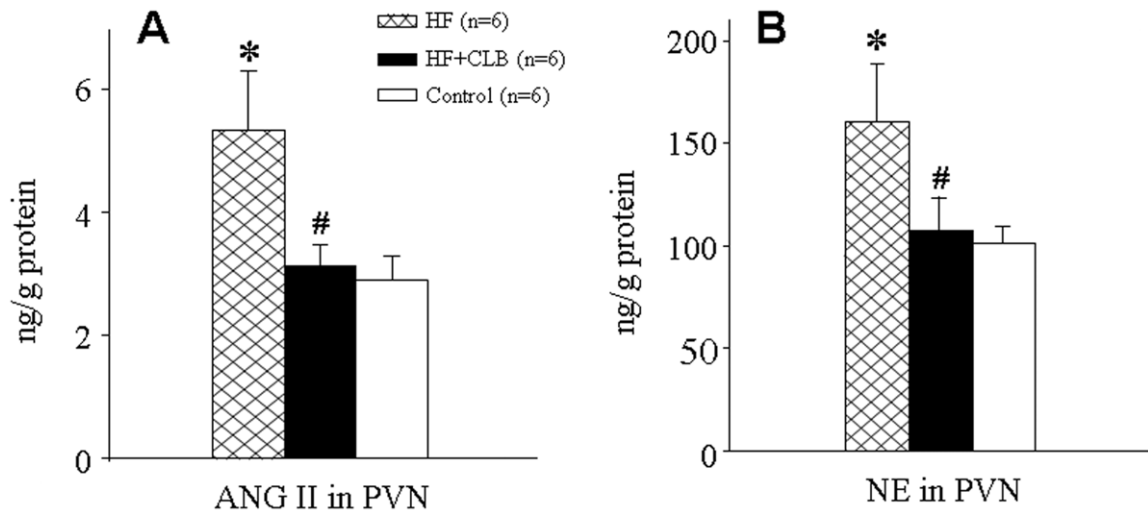

**Figure 4. Effect of CLB on PVN levels of ANG II and NE in HF rats.** A. Comparison of ANG II level. B. Comparison of NE level. The PVN levels of ANG II and NE were higher in HF rats than in control rats. The PVN levels of ANG II and NE were lower in HF+CLB rats than in HF rats. \* $P < 0.01$  vs. control group; # $P < 0.01$  vs. HF group. doi:10.1371/journal.pone.0048771.g004

concentrations. In the HF+CLB group, rats were treated with CLB by intragastric administration (3 mg/kg/day). In the normal control and HF group, the rats were treated with equal volume saline. On the 44th day of the experiment, rats were hemody-

namicallly evaluated and killed to be assayed in morphology and biochemistry.

#### Electrophysiological Recordings

The electrophysiological recordings were performed as previously described [3,12,13] by BL-820S Data Acquisition & Analysis System analyzing system (Chengdu TME Technology Co, Ltd, Chengdu, China). At the end of experiment, rats were anesthetized (pentobarbital, 40 mg/kg i.p). Electrocardiogram (ECG) was recorded before hemodynamics assessment and heart rate (HR) was derived from ECG tracing. A micromanometer connected with PE-50 catheter (Millar Instruments) was inserted into the left ventricle via the right carotid artery. LVSP, LVEDP and  $LV \pm dp/dt_{max}$  were derived from the LV pressure tracing.

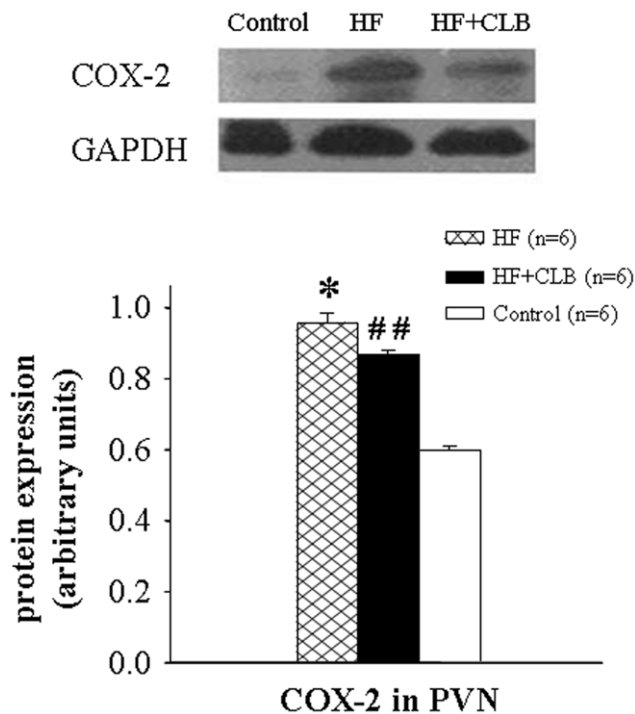

**Figure 5. Comparison of protein expression for COX-2 in the PVN in rats.** Representative Western blots were aligned with the matching grouped relative optical density values of immunoblot band. COX-2 protein expression in the PVN increased in HF rats when compared with control rats. The PVN level of COX-2 protein expression was lower in HF+CLB rats than in HF rats. \* $P < 0.01$  vs. control group; ## $P < 0.05$  vs. HF group. doi:10.1371/journal.pone.0048771.g005

#### Preparation of Blood and Tissue Samples

Rats were decapitated while still under deep anaesthesia to collect trunk blood and tissue samples. Trunk blood was collected in chilled ethylene diamine tetra acetic acid tubes. Plasma samples were separated and stored at  $-86^{\circ}\text{C}$  until assayed for ANG II, NE and ANP levels. The brain, heart and lung were harvested and weighed with 30 seconds, rapidly frozen in liquid nitrogen, and used for histopathological examination and for biochemical assay as described below.

Palkovits's microdissection method was applied to isolate the PVN as described before [3,41]. In brief, the brain was sectioned serially in 300 mm increments from the bregma to lambda using a cryostat. The sections were transferred to coverslips and the PVN was punched with the help of a stereotaxic atlas and stored at  $-86^{\circ}\text{C}$ . Frozen heart and PVN tissue samples were homogenized in PBS containing a protease inhibitor PMSF and then centrifuged at 3500 rpm. The resulting supernatants were assayed for protein concentration by the bicinchoninic acid method with a BCA Protein Assay kit and then subjected to further analyses for ELISA, HPLC and Western blot.

#### Anatomic Measurements

Both lung weight (LW) and heart ventricular weight (VW) versus body weight (BW) were used as indexes of pulmonary



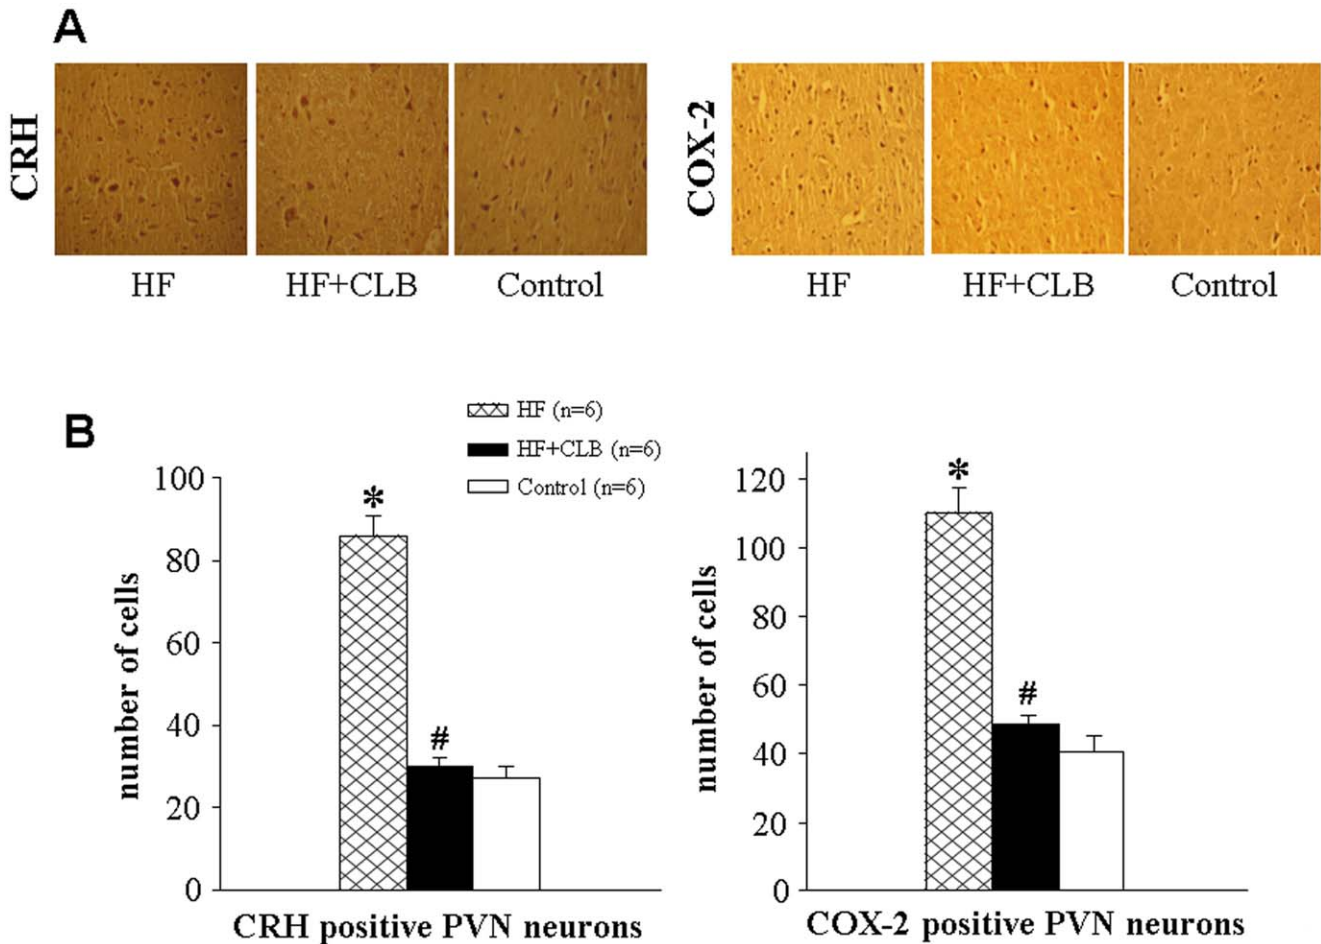

**Figure 6. CRH and COX-2 expression in the PVN in control, HF and HF+CLB rats.** A. Immunohistochemistry for CRH (deep brown dots) and COX-2 (brown) positive neurons in control, HF and HF+CLB rats. B. Bar graph comparing numbers of PVN CRH and COX-2 positive neurons in different groups. The HF rats had more COX-2 and CRH-positive neurons in the PVN than control rats. There were fewer positive neurons of COX-2 and CRH in the PVN of HF+CLB rats than in HF rats. \* $P < 0.01$  vs. control group; # $P < 0.01$  vs. HF group. doi:10.1371/journal.pone.0048771.g006

congestion and ventricular remodeling, generally considered as two indices of the HF severity.

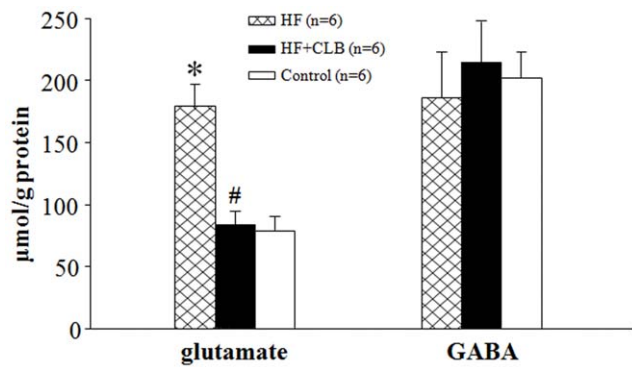

**Figure 7. Glutamate and GABA release in the PVN in control, HF and HF+CLB rats.** Compared with control rats, HF rats had higher levels of glutamate in the PVN. Glutamate release in the PVN was lower in HF+CLB rats than in HF rats. However, there were no significant differences in GABA among control, HF, and HF+CLB rats. \* $P < 0.01$  vs. control group; # $P < 0.01$  vs. HF group. doi:10.1371/journal.pone.0048771.g007

**ANG II, NE and ANP Assessments in Plasma and Tissues**

ANG II, NE and ANP levels in plasma and tissues were measured using rat ELISA kits according to the manufacturer’s specifications. The minimum detectable concentration of ANG II, NE and ANP was 0.45, 4.7 and 15.6 pg/ml respectively.

**Immunohistochemical Studies**

A usual avidin-biotin-peroxidase complex procedure was applied [42]. Transverse sections from brains were obtained from the region approximately 1.80 mm from the bregma. Immunohistochemical labelling was performed in floating sections as described previously [43] to identify COX-2 (Santa Cruz Biotechnology) and corticotropin releasing hormone (CRH; Santa Cruz Biotechnology). Images were captured at  $\times 200$  magnification using a BX-40 Olympus microscope. For each rat, tagged neurons within the bilateral borders of PVN were counted manually in 3 adjacent coronal transverse sections, and an average value was reported (positive neurons/ $100 \mu m^2$ ). BI-2000 Medical Image Analysis System (Chengdu TME Technology, Chengdu, China) was used to confirm the manual cell counts and to quantify the intensity of COX-2 expression in the PVN.

## Western Blot

Protein extracted from punches of the PVN was used for measurement of COX-2 and CRH expression by western blotting as described by others [44]. Protein loading was controlled by probing all western blots with anti-GAPDH antibody and normalizing COX-2 and CRH protein intensities to that of GAPDH. Band densities were analyzed with NIH ImageJ software.

## Measurements of Glutamate and GABA in PVN Tissues

The contents of glutamate (Glu) and GABA were assayed by high performance liquid chromatography (HPLC) with fluorescence detection using a spectrophotometer (Varian, Holland) as described previously [45]. The derivatization of detected specimens was performed in an automatic sampler (Prostar, Varian, Holland). KR100 -5C18 column (Kromasil, Akzonobel, Switzerland) were used to dissociate the derivatives. Buffer A (0.1 M PBS, pH6.8) and Buffer B (pure methanol) constituted the gradient elution mobile phase. Data were analyzed with the ANASTAR

## References

- Francis J, Zhang ZH, Weiss RM, Felder RB (2004) Neural regulation of the proinflammatory cytokine response to acute myocardial infarction. *Am J Physiol Heart Circ Physiol* 287: H791–H797.
- Zaninger J, Czachurski J (2000) Chronic oxidative stress in the RVLM modulates sympathetic control of circulation in pigs. *Pflugers Arch* 439: 489–494.
- Kang YM, He RL, Yang LM, Qin DN, Guggilam A, et al. (2009) Brain tumour necrosis factor- $\alpha$  modulates neurotransmitters in hypothalamic paraventricular nucleus in heart failure. *Cardiovas Res* 83: 737–746.
- Swanson LW, Sawchenko PE (1980) Paraventricular nucleus: a site for the integration of neuroendocrine and autonomic mechanisms. *Neuroendocrinology* 31: 410–417.
- Boudaba C, Szabo K, Tasker JG (1996) Physiological mapping of local inhibitory inputs to the hypothalamic paraventricular nucleus. *J Neurosci* 16: 7151–7160.
- Antonaccio MJ, Kerwin L, Taylor DG (1978) Reductions in blood pressure, heart rate and renal sympathetic nerve discharge in cats after the central administration of muscimol, a GABA agonist. *Neuropharmacology* 17: 783–791.
- Brennan TJ, Haywood JR, Ticku MK (1983) GABA receptor binding and hemodynamic responses to ICV GABA in adult spontaneously hypertensive rats. *Life Sci* 33: 701–709.
- Arabia AM, Catapano L, Storini C, Perego C, De Luigi A, et al. (2002) Impaired central stress-induced release of noradrenaline in rats with heart failure: a microdialysis study. *Neuroscience* 114: 591–599.
- Zhang K, Li YF, Patel KP (2002) Reduced endogenous GABA-mediated inhibition in the PVN on renal nerve discharge in rats with heart failure. *Am J Physiol Regul Integr Comp Physiol* 282: R1006–R1015.
- Francis J, Wei SG, Weiss RM, Felder RB (2004) Brain angiotensin-converting enzyme activity and autonomic regulation in heart failure. *Am J Physiol Heart Circ Physiol* 287: H2138–H2146.
- Zhang ZH, Wei SG, Francis J, Felder RB (2003) Cardiovascular and renal sympathetic activation by blood-borne TNF in rat: the role of central prostaglandins. *Am J Physiol Regul Integr Comp Physiol* 284: R916–R927.
- Kang YM, Ma Y, Elks C, Zheng JP, Yang ZM, et al. (2008) Cross-talk between cytokines and renin-angiotensin in hypothalamic paraventricular nucleus in heart failure: role of nuclear factor- $\kappa$ B. *Cardiovasc Res* 79: 671–678.
- Kang YM, Zhang ZH, Xue B, Weiss RM, Felder RB (2008) Inhibition of brain proinflammatory cytokine synthesis reduces hypothalamic excitation in rats with ischemia-induced heart failure. *Am J Physiol Heart Circ Physiol* 295: H227–H236.
- Kang YM, Zhang ZH, Johnson RF, Yu Y, Beltz T, et al. (2006) Novel effect of mineralocorticoid receptor antagonism to reduce proinflammatory cytokines and hypothalamic activation in rats with ischemia-induced heart failure. *Circ Res* 99: 758–766.
- Ueno N, Takegoshi Y, Kamei D, Kudo I, Murakami M (2005) Coupling between cyclooxygenases and terminal prostanoid synthases. *Biochem Biophys Res Commun* 338: 70–76.
- Ericsson A, Arias C, Sawchenko PE (1997) Evidence for an intramedullary prostaglandin-dependent mechanism in the activation of stress-related neuroendocrine circuitry by intravenous interleukin-1. *J Neurosci* 17: 7166–7179.
- Hoffman WE, Schmid PG (1979) Cardiovascular and antidiuretic effects of central prostaglandin E<sub>2</sub>. *J Physiol* 288: 159–169.
- Yu Y, Kang YM, Zhang ZH, Wei SG, Chu Y, et al. (2007) Increased cyclooxygenase-2 expression in hypothalamic paraventricular nucleus in rats with heart failure: role of nuclear factor  $\kappa$ B. *Hypertension* 49: 511–518.
- Delgado RM 3rd, Nawar MA, Zewail AM, Kar B, Vaughn WK, et al. (2004) Cyclooxygenase-2 Inhibitor Treatment Improves Left Ventricular Function and Mortality in a Murine Model of Doxorubicin-Induced Heart Failure. *Circulation* 109: 1428–1433.
- Braunwald E, Bristow MR (2000) Congestive heart failure: fifty years of progress. *Circulation* 102: IV14–IV 23.
- Pieske B, Hasenfuss G (2000) Pathophysiological basis of heart failure. *Thromb Haemostasis* 77: 284–292.
- Dieterich HA, Wendt C, Saborowski F (2005) Cardioprotection by aldosterone receptor antagonism in heart failure. Part I. The role of aldosterone in heart failure. *Fiziol Cheloveka* 31: 97–105.
- Liang CS (2007) Cardiac sympathetic nerve terminal function in congestive heart failure. *Acta Pharmacol Sin* 28: 921–927.
- Helwig BG, Musch TI, Craig RA, Kenney MJ (2007) Increased interleukin-6 receptor expression in the paraventricular nucleus of rats with heart failure. *Am J Physiol Regul Integr Comp Physiol* 292: R1165–R1173.
- Li T, Singal PK (2000) Adriamycin-induced early changes in myocardial antioxidant enzymes and their modulation by Probuco. *Circulation* 102(17): 2105–2110.
- Rabelo E, De Angelis K, Bock P, Gatelli Fernandes T, Cervo F, et al. (2001) Baroreflex sensitivity and oxidative stress in adriamycin-induced heart failure. *Hypertension* 38: 576–580.
- Siveski-Iliskovic N, Kaul N, Singal PK (1994) Probuco promotes endogenous antioxidants and provides protection against adriamycin-induced cardiomyopathy in rats. *Circulation* 89: 2829–2835.
- Van Acker SA, Kramer K, Voest EE, Grimbergen JA, Zhang J, et al. (1996) Doxorubicin-induced cardiotoxicity monitored by ECG in freely moving mice: a new model to test potential protectors. *Cancer Chemother Pharmacol* 38: 95–101.
- Pacher P, Liaudet L, Bai P, Mabley JG, Kaminski PM, et al. (2003) Potent metalloporphyrin peroxynitrite decomposition catalyst protects against the development of doxorubicin-induced cardiac dysfunction. *Circulation* 107: 896–904.
- Lindley TE, Doobay MF, Sharma RV, Davison RL (2004) Superoxide is involved in the central nervous system activation and sympathoexcitation of myocardial infarction-induced heart failure. *Circ Res* 94: 402–409.
- Tan J, Wang H, Leenen FH (2004) Increases in brain and cardiac AT<sub>1</sub> receptor and ACE densities after myocardial infarct in rats. *Am J Physiol Heart Circ Physiol* 286: H1665–H1671.
- Zucker IH (2006) Novel mechanisms of sympathetic regulation in chronic heart failure. *Hypertension* 48: 1005–1011.
- Johnson AK, Thunhorst RL (1997) The neuroendocrinology of thirst and salt appetite: visceral sensory signals and mechanisms of central integration. *Front Neuroendocrinol* 18: 292–353.
- McKinley MJ, McAllen RM, Pennington GL, Smardencas A, Weisinger RS, et al. (1996) Physiological actions of angiotensin II mediated by AT<sub>1</sub> and AT<sub>2</sub> receptors in the brain. *Clin Exp Pharmacol Physiol Suppl* 3: S99–S104.
- Oldfield BJ, Davern PJ, Giles ME, Allen AM, Badoer E, et al. (2001) Efferent neural projections of angiotensin receptor (AT<sub>1</sub>) expressing neurones in the hypothalamic paraventricular nucleus of the rat. *J Neuroendocrinol* 13: 139–146.
- Raasch W, Wittmershaus C, Dendorfer A, Voges I, Pahlke F, et al. (2006) Angiotensin II inhibition reduces stress sensitivity of hypothalamo-pituitary-adrenal axis in spontaneously hypertensive rats. *Endocrinology* 147: 3539–3546.

software. External standard method was applied to quantitate the concentrations of Glu and GABA.

## Statistical Analysis

Results are presented as mean  $\pm$  SEM. Statistical comparisons were analyzed by using one-way analysis of variance (ANOVA) and Fisher Least-significant difference test. A probability of  $P < 0.05$  was considered to be statistically significant.

## Acknowledgments

We thank Dr. Carrie M. Elks (Pennington Biomedical Research Center, Louisiana State University System) for helpful comments and language correction during preparation of this manuscript.

## Author Contributions

Conceived and designed the experiments: MZ YMK DNQ. Performed the experiments: MZ WL CYB. Analyzed the data: MZ YMK CYB. Contributed reagents/materials/analysis tools: MZ YMK DNQ. Wrote the paper: MZ YMK WJZ DNQ.

37. Saavedra JM, Ando H, Armando I, Baiardi G, Bregonzio C, et al. (2005) Anti-stress and anti-anxiety effects of centrally acting angiotensin II AT1 receptor antagonists. *Regul Pept* 128: 227–238.
38. Catt KJ, Millan MA, Wynn PC, Mendelsohn FA, Aguilera G (1987) Brain receptors for hypothalamic hormones. *Adv Biochem Psychopharmacol* 43: 51–67.
39. McKinley MJ, Allen AM, Mathai ML, May C, McAllen RM, et al. (2001) Brain angiotensin and body fluid homeostasis. *Jpn J Physiol* 51: 281–289.
40. American Physiological Society. (2002) Guiding principles for research involving animals and human beings. *Am J Physiol Regul Integr Comp Physiol* 283: R281–R283.
41. MohanKumar SM, MohanKumar PS, Quadri SK (1998) Specificity of interleukin-1 induced changes in monoamine concentrations in hypothalamic nuclei: blockade by interleukin-1 receptor antagonist. *Brain Res Bull* 47: 29–34.
42. Huang J, Weiss ML (1999) Characterization of the central cell groups regulating the kidney in the rat. *Brain Res* 845: 77–91.
43. Aston-Jones G, Zhu Y, Card JP (2004) Numerous GABAergic afferents to locus ceruleus in the pericerulear dendritic zone: possible interneuronal pool. *J Neurosci* 24: 2313–2321.
44. Jaimes EA, Tian RX, Pearse D, Raj L (2005) Upregulation of glomerular COX-2 by angiotensin II: role of reactive oxygen species. *Kidney Int* 68: 2143–2153.
45. Ouyang C, Guo L, Lu Q, Xu X, Wang H (2007) Enhanced activity of GABA receptors inhibits glutamate release induced by focal cerebral ischemia in rat striatum. *Neurosci Lett* 420: 174–178.
